# Supplementary material
Source: publisher figshare collection journal article supplement (https://acs.figshare.com/ndownloader/files/14376902)
Supplement: Supplementary file 1 [file 14376902]

Supporting Information Available

**One-pot Ionothermal Synthesized Carbon Nitride Heterojunction Nanorods for Simultaneous Photocatalytic Reduction and Oxidation Reactions: Synergistic Effect and Mechanism Insight**

*Ailing Jin, Xin Liu\*, Mengru Li, Yushuai Jia\*, Changfeng Chen, and Xiangshu Chen*

Institute of Advanced Materials, College of Chemistry and Chemical Engineering, Jiangxi Normal University, Nanchang 330022, China

Corresponding author: \*liuxin@jxnu.edu.cn (X. Liu), ysjia@jxnu.edu.cn (Y.S. Jia)

Number of pages: 4

Number of figures: 3

Number of tables: 0

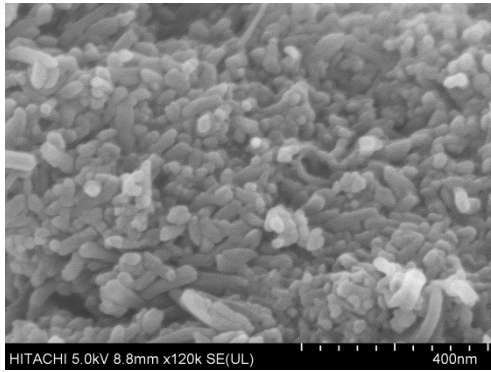

**Figure S1.** SEM image of ms-CN-1.

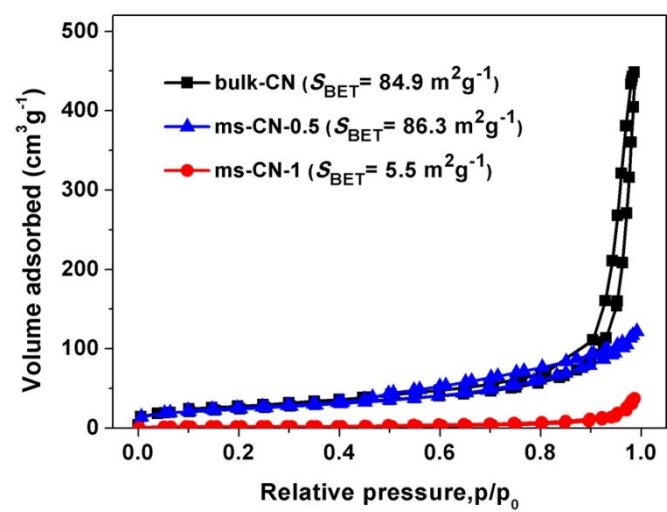

**Figure S2.** Nitrogen adsorption–desorption isotherms of bulk-CN, ms-CN-0.5, and ms-CN-1.

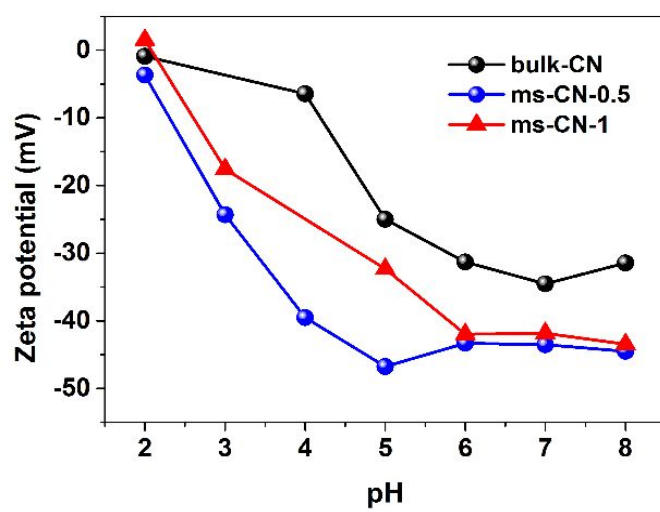

**Figure S3.** Zeta potentials of bulk-CN, ms-CN-0.5, and ms-CN-1 under different pH.
